# Supplementary material for: Outcomes of underweight, overweight, and obese pediatric kidney transplant recipients
Source: Springer Nature journal article supplement (doi:10.1007/s00467-018-4038-8), 2018-08-22
Supplement: MOESM1 [file 16064204]

| Supplementary Table 1. Induction and Immunosuppression Medicationsb | | | | | | |
| --- | --- | --- | --- | --- | --- | --- |
| Mean ± SD or N (%) | **Overall** | **Underweight** | **Normal Weight** | **Overweight** | **Obese** |
| Induction therapy | (N=9886) | (N=746) | (N=6033) | (N=1510) | (N=1597) |
| Thymoglobulin  Basiliximab  Alemtuzumab  OKT3 | 4634  3573  934  745 | 320  248  86  92 | 2826  2196  553  458 | 705  556  151  98 | 783  573  144  97 |
| Steroid | 13802  (N=16915) | 1237  (N=1489) | 8448 (N=11597) | 2065 (N=2524) | 2052  (N=2542) |
| Tacrolimus | 11793  (N=11850) | 875  (N=881) | 7277  (N=7314) | 1799  (N=1808) | 1842  (N=1847) |
| Mycophenolate Mofetil | 12715  (N=12807) | 950  (N=957) | 7810  (N=7860) | 1960  (N=1974) | 1995  (N=2016) |
| Cyclosporine | 5047  (N=5203) | 564  (N=578) | 3098  (N=3188) | 712  (N=741) | 673  (N=696) |
| Sirolimus | 605  (N=620) | 54  (N=54) | 380  (N=387) | 81  (N=86) | 90  (N=93) |
| b Large amount of missing data, actual number and total N provided | | | | | | |
